# Supplementary material for: Zinc Ion-Based Switch-on Fluorescence-Sensing Probes for the Detection of Tetracycline
Source: MDPI journal article supplement (doi:10.3390/molecules27238403), 2022-12-01
Supplement: s1 [file s1]

**Table S1.** Comparison of the developed method with the existing methods.

| Sensing probes                                              | Method                      | Linear<br>dynamic range      | LOD (nM )                       | Analysis<br>time | Ref.         |
|-------------------------------------------------------------|-----------------------------|------------------------------|---------------------------------|------------------|--------------|
| Ir(III)@SiNPs-Eu <sup>3+</sup>                              | Ratiometric<br>fluorescence | 0.01–20 $\mu$ M              | 4.9 nM                          | Few<br>minutes   | [23]         |
| His-AuNCs/Eu <sup>3+</sup>                                  | Ratiometric<br>fluorescence | 10 nM -60 $\mu$ M            | 4 nM                            | 10 min           | [26]         |
| Eu <sup>3+</sup> -AgNPs                                     | Fluorescence<br>enhancement | 0.01–10 $\mu$ M              | 4 nM                            | Few<br>minutes   | [28]         |
| AuNPs-SiO <sub>2</sub> /Eu <sup>3+</sup>                    | Fluorescence<br>enhancement | 0 – 6 $\mu$ M                | 83.1 nM                         | Few<br>minutes   | [13]         |
| Eu <sup>3+</sup> -CQDs                                      | Fluorescence<br>quenching   | 0.5 – 200 $\mu$ M            | 300 nM                          | Few<br>minutes   | [19]         |
| g-C <sub>3</sub> N <sub>4</sub> /Eu <sup>3+</sup>           | Ratiometric<br>fluorescence | 0.25-80 $\mu$ M              | 6.5 nM                          | Few<br>minutes   | [29]         |
| Zn <sup>2+</sup> coordination<br>polymers (CPs)             | Fluorescence<br>quenching   | 1-60 $\mu$ M                 | 0.86 $\mu$ M/1.4<br>1 $\mu$ M   | Few<br>minutes   | [14]         |
| Zn <sup>2+</sup> coordination<br>polymers (CPs)             | Fluorescence<br>enhancement | 0.2-6.0 $\mu$ M              | 12 nM                           | 5 min            | [30]         |
| Zn <sup>2+</sup> -MOFs                                      | Fluorescence<br>quenching   | 1-10 $\mu$ M                 | 0.15 $\mu$ M                    | Few<br>minutes   | [39]         |
| Zn <sup>2+</sup> -MOFs                                      | Fluorescence<br>quenching   | 0-75 $\mu$ M<br>0-10 $\mu$ M | 0.234 $\mu$ M/<br>0.377 $\mu$ M | Few<br>minutes   | [40]         |
| Zn <sup>2+</sup> -MOFs                                      | Fluorescence<br>enhancement | 0.02-13 $\mu$ M              | 17 nM                           | 1 min            | [31]         |
| Fe <sub>3</sub> O <sub>4</sub> @ZnS:Mn <sup>2+</sup><br>QDs | Fluorescence<br>quenching   | 10 – 700 nM                  | 1.2 nM                          | Few<br>minutes   | [46]         |
| Eu <sup>3+</sup> functionalized<br>ZnO QDs                  | Ratiometric<br>fluorescence | 5 nM–3 $\mu$ M               | 4 nM                            | 100 s            | [15]         |
| Zn <sup>2+</sup> -Tris complex                              | Fluorescence<br>enhancement | 15-300 nM                    | ~7 nM                           | 10 min           | This<br>work |

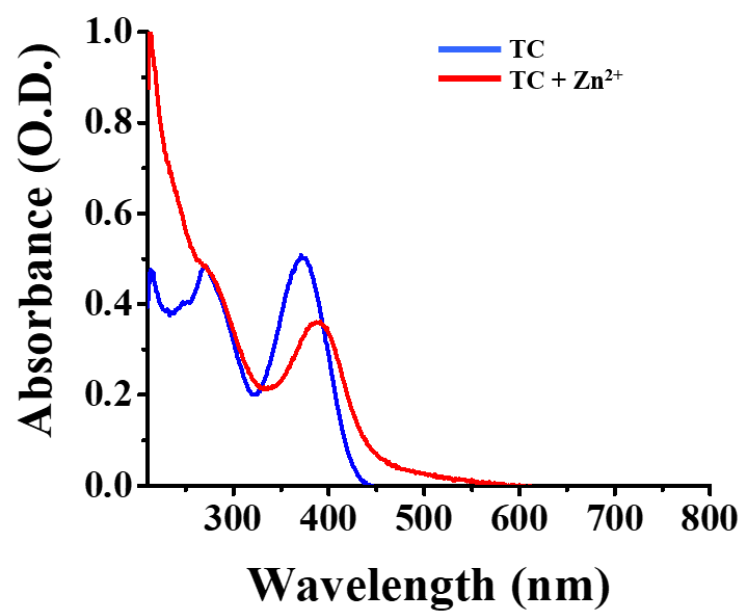

**Figure S1.** UV–Vis absorption spectra of the samples containing TC (40  $\mu$ M) without (blue) and with (red) the addition of Zn<sup>2+</sup> (1.49 mM).

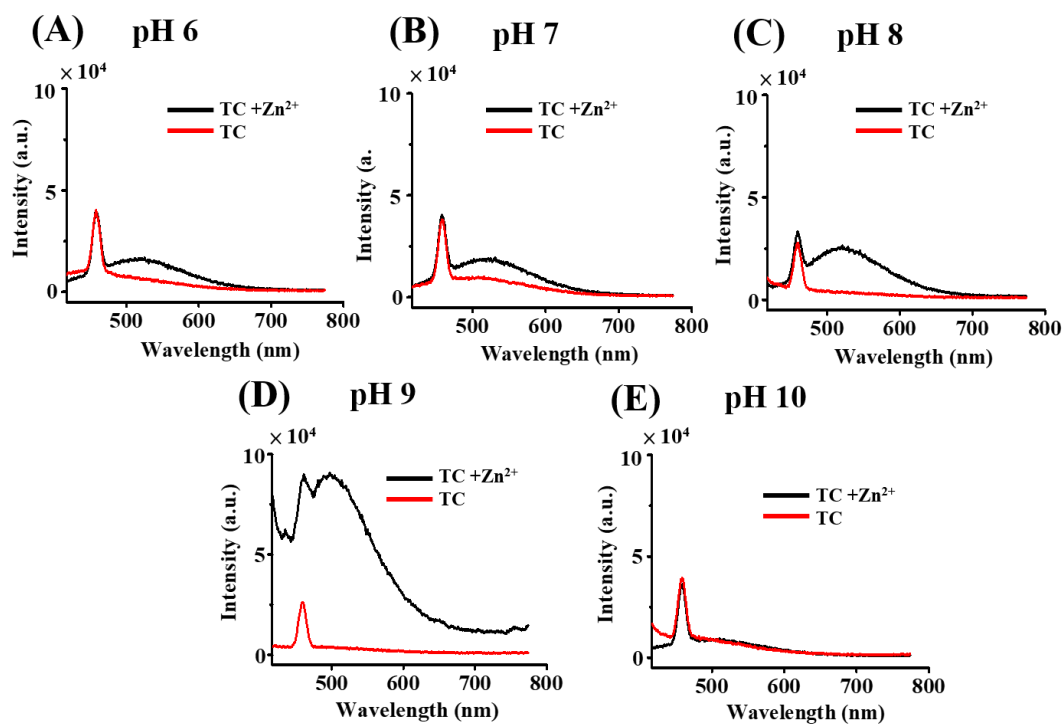

**Figure S2.** Examination of pH effects. (A)-(E) Representative fluorescence spectra of the samples containing TC (0.1  $\mu$ M, 300  $\mu$ L) obtained before (red) and after adding Zn<sup>2+</sup> (1.49 mM) (black) at different pH conditions for min followed by examination of fluorescence spectroscopy ( $\lambda_{\text{ex}}$  = 397 nm).

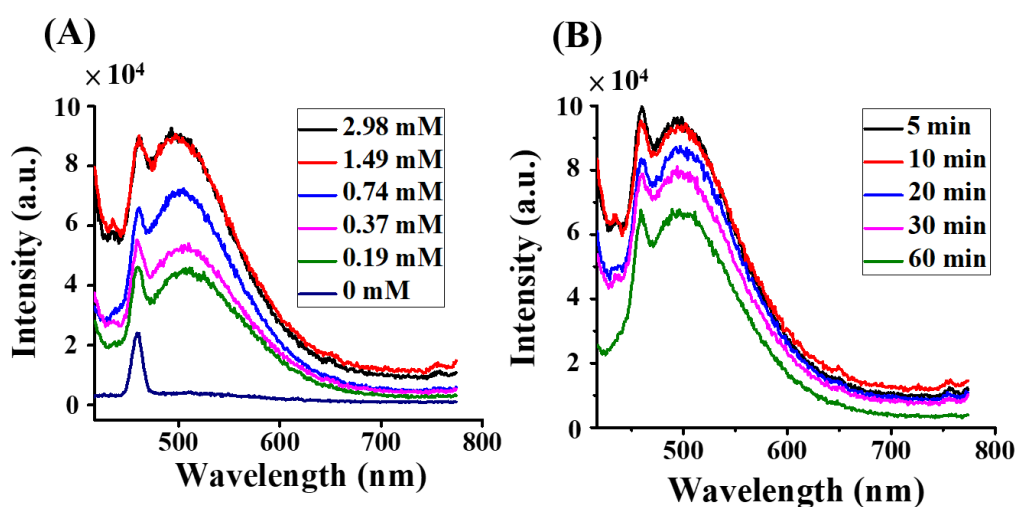

**Figure S3.** Optimization of experimental parameters. (A) Representative fluorescence spectra of the samples containing TC (0.1  $\mu\text{M}$ , 300  $\mu\text{L}$ ) obtained before and after adding  $\text{Zn}^{2+}$  at different concentrations (0.19-2.98 mM) for 10 min ( $\lambda_{\text{ex}} = 397$  nm). (B) Representative fluorescence spectra of the samples containing TC (0.1  $\mu\text{M}$ , 300  $\mu\text{L}$ ) obtained after adding  $\text{Zn}^{2+}$  (1.49 mM) for different incubation times ( $\lambda_{\text{ex}} = 397$  nm).

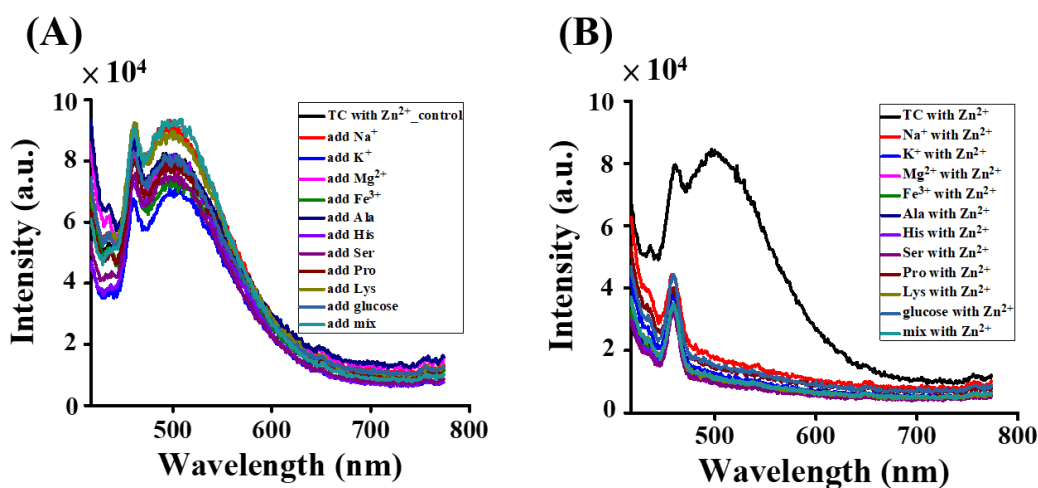

**Figure S4.** Examination of interference effects. Fluorescence spectra of the samples containing (A) TC (300  $\mu\text{L}$ , 0.1  $\mu\text{M}$ ) with adding  $\text{Zn}^{2+}$  (1.49 mM) in the absence (black) and in the presence of interference species (15  $\mu\text{L}$ , 10  $\mu\text{M}$ ) ( $\lambda_{\text{ex}} = 397$  nm). (B) Fluorescence spectra of the samples containing  $\text{Zn}^{2+}$  (1.49 mM) with the presence of TC (0.1  $\mu\text{M}$ ) (black) and other interference species (0.5  $\mu\text{M}$ ) ( $\lambda_{\text{ex}} = 397$  nm).

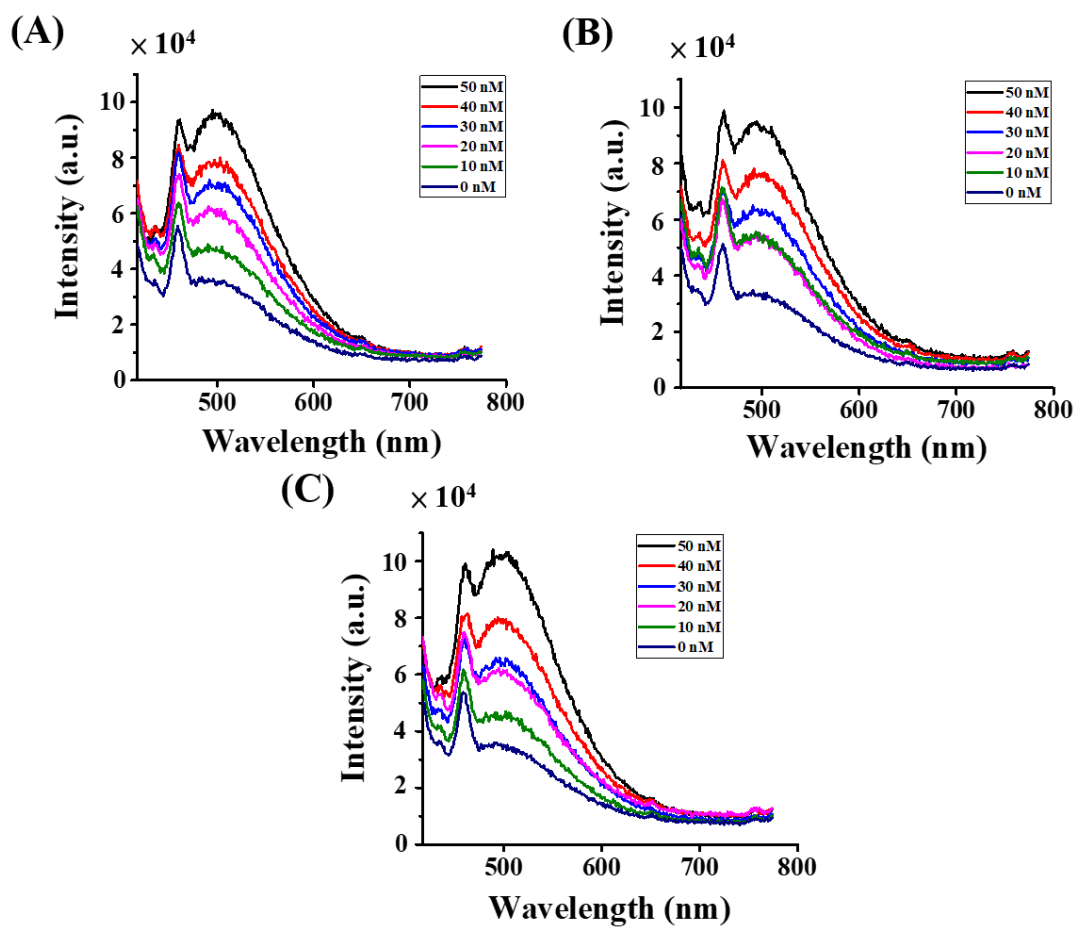

**Figure S5.** (A)-(C) Three replicated fluorescence spectra of the as-prepared chicken broth samples containing TC (20 nM) obtained by the standard addition method with the addition of TC at different concentrations (0-50 nM) ( $\lambda_{\text{ex}} = 397 \text{ nm}$ ).
